# Supplementary material for: Prolonged Exposure to Microgravity Reduces Cardiac Contractility and Initiates Remodeling in Drosophila
Source: PubMed Central journal article supplement — Cell Rep. Author manuscript; Available in PMC 2021 Jan 6. (PMC7787258; doi:10.1016/j.celrep.2020.108445), 2020-11-25
Supplement: NIHMS1653536-supplement-1.pdf [file NIHMS1653536-supplement-1.pdf]

## Supplemental Information

### Prolonged Exposure to Microgravity

### Reduces Cardiac Contractility and Initiates

### Remodeling in *Drosophila*

Stanley Walls, Soda Diop, Ryan Birse, Lisa Elmen, Zhuohui Gan, Sreehari Kalvakuri, Santiago Pineda, Curran Reddy, Erika Taylor, Bosco Trinh, Georg Vogler, Rachel Zarndt, Andrew McCulloch, Peter Lee, Sharmila Bhattacharya, Rolf Bodmer, and Karen Ocorr

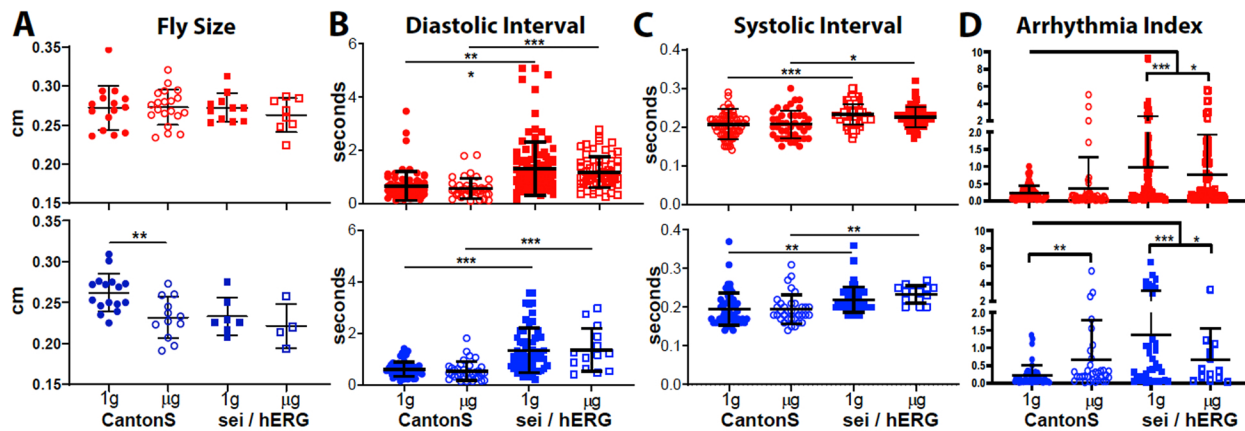

**Supplemental Figure 1 (related to Figure 1). Effects of lifetime microgravity exposure on fly size and chronotropy. (A)** Fly size was measured from still images of flies in climbing assay videos. For all panels females are in red and males are in blue. **(B)** Mean Systolic and **(C)** Diastolic intervals were unchanged by  $\mu\text{g}$  exposure in both Canton S controls and *sei/hERG* mutants although mutants under both gravity conditions showed the expected prolongation of SI and DI. **(D)** Rhythmicity was not significantly altered by  $\mu\text{g}$ . (2-way ANOVA with Tukey's multiple comparison posthoc test; \* $p < 0.05$ , \*\* $p < 0.01$ , \*\*\* $p < 0.001$ )

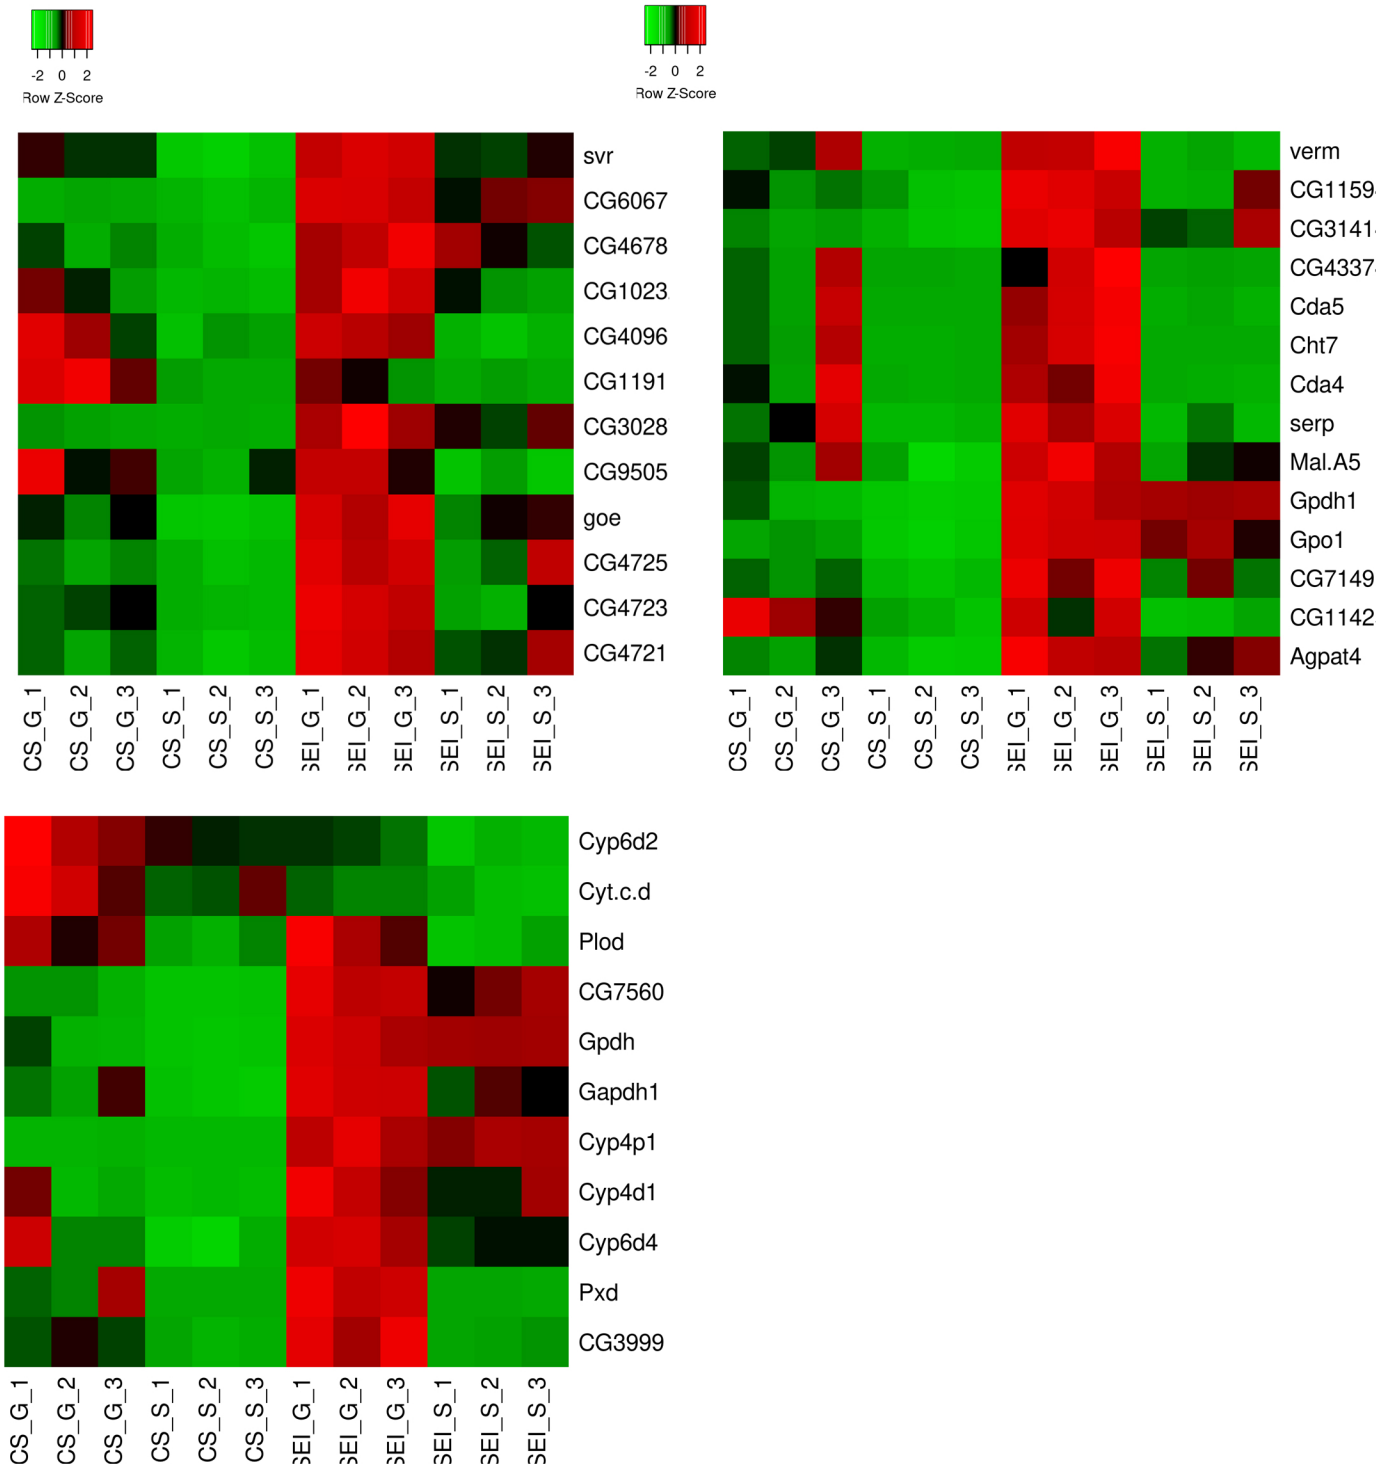

**Supplemental Figure 2 (related to Figure 2). Heatmap of differentially expressed gene subsets in CS and *sei/hERG* hearts at 1g and  $\mu$ g.** Heatmap comparison of comparing CantonS ground controls (CS\_G) CantonS microgravity exposed (CS\_S), *sei/hERG* ground controls (*SEI/HERG\_G*) and *sei/hERG* space flown (*SEI/HERG\_S*) fly hearts. Data was normalized to the average expression across row for each gene (Z-score). “Cool” green colors denote low relative expression, “Warm” red colors denote high relative expression while black denotes average expression.

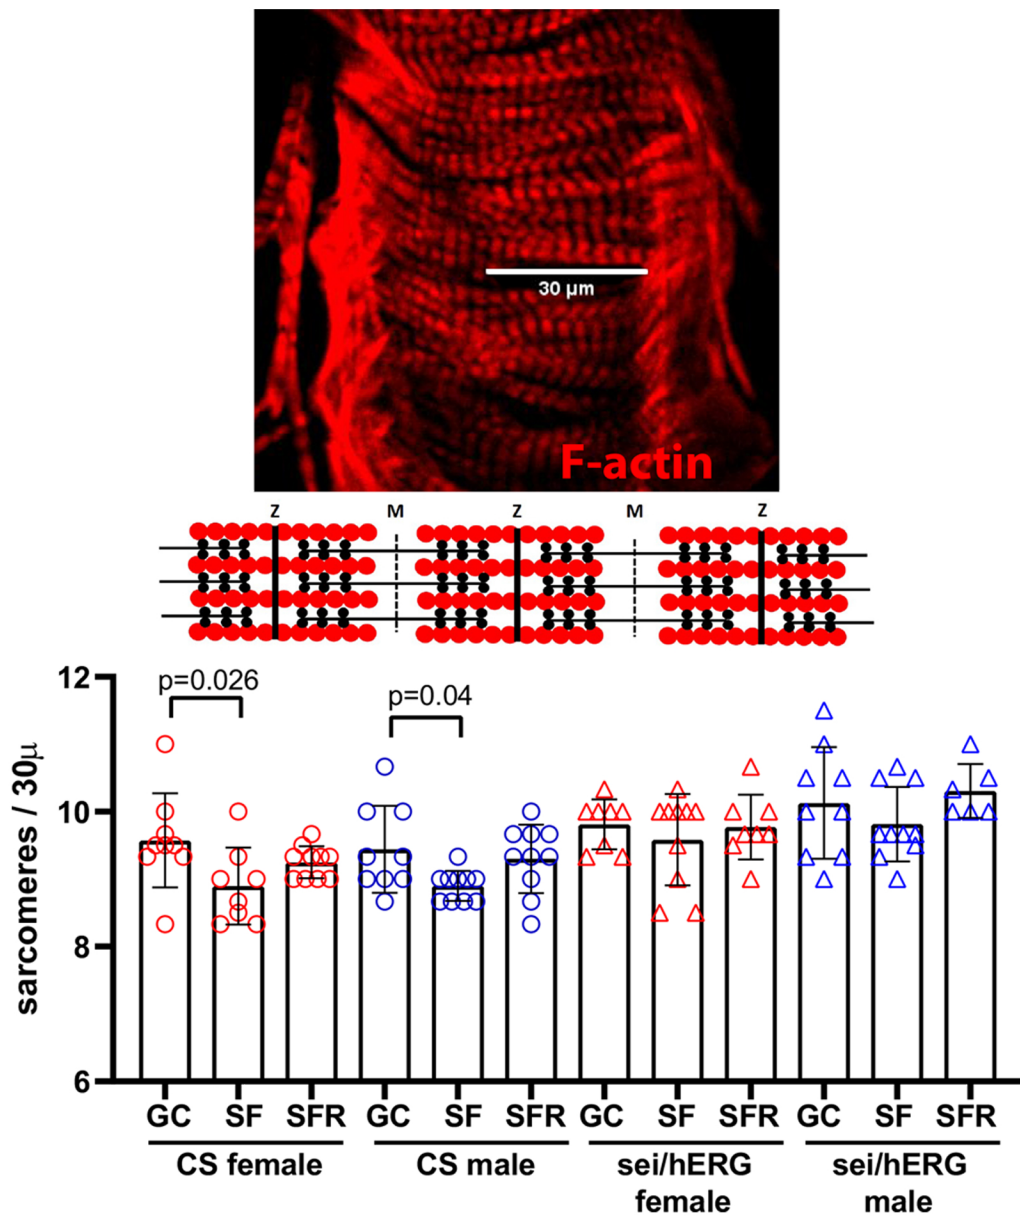

**Supplemental Figure 3 (related to Figure 3). Sarcomere length decreased under ug.** (A) Z-stack image of myofibrillar structure in myocardial cells from a ground control, CantonS female. Myofilaments were stained with phalloidin to detect F-actin (red), scale bar is 30 microns. (B) Schematic showing how the F-actin staining in A is arranged within sarcomeres. (C) Mean sarcomere count per 30 micron stretch of individual myofibrils showed a significant decrease in wildtype CS flies when reared under ug. Significance was determined by one way ANOVA and Tukey's multiple comparisons post-hoc test.

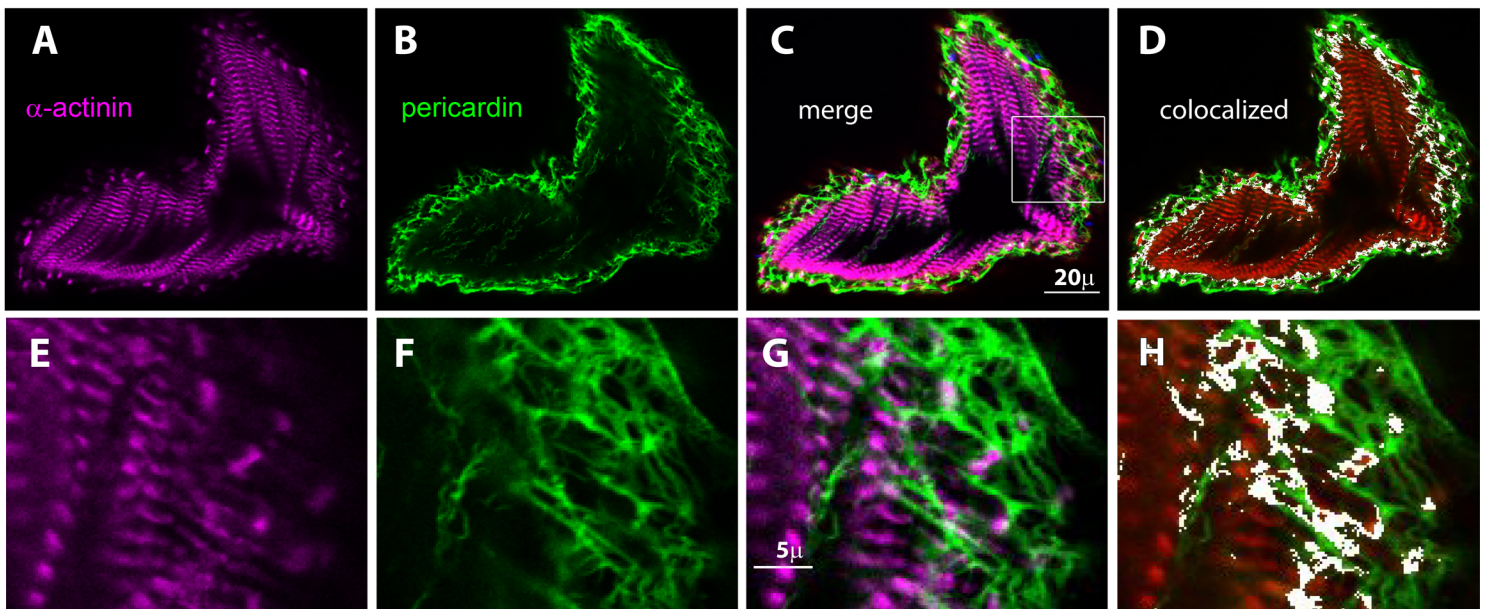

**Supplemental Figure 4 (related to Figure 3). Pericardin network interacts with cardiac myofibrils at Z Bands (A&B)** Confocal images of a fly heart stained for the Z band protein  $\alpha$ -actinin (magenta) and pericardin (green), a fly ortholog of collagen IV. Images show a single, 1  $\mu$  slice from a Z stack through a cardiac chamber. **(C)** Merged images with a box showing the area of detail in (E-H). **(D)** Images in A and B were analyzed using a colocalization plugin (JACoP) in Image J; regions where  $\alpha$ -actinin and pericardin co-localize within this 1  $\mu$  slice are shown in white. **(E&F)** Enlarged image showing  $\alpha$ -actinin stained Z bands (magenta) and the collagen IV network (green). **(G)** Merged images. **(H)** Colocalized  $\alpha$ -actinin and collagen IV shown in white.

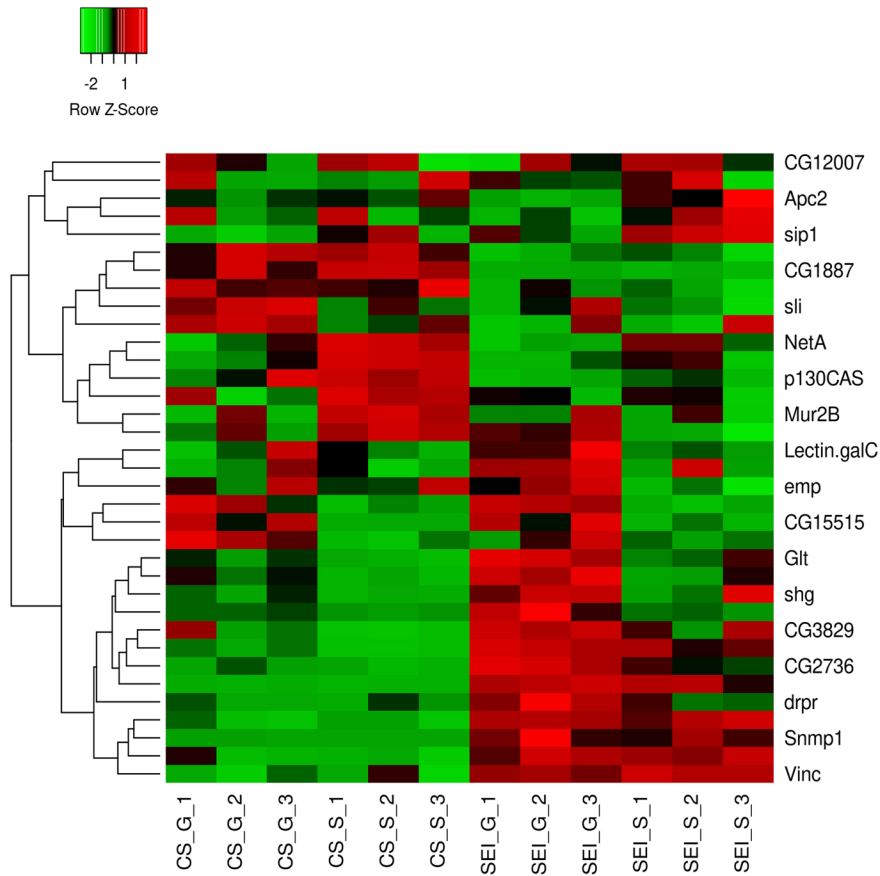

**Supplemental Figure 5 (related to Figure 2). Heatmap of differentially expressed cell adhesion related genes in CS and *sei/hERG* at 1g and  $\mu\text{g}$ .** Heatmap comparison of comparing CantonS ground controls (CS\_G), CantonS  $\mu\text{g}$  exposed (CS\_S), *sei/hERG* ground controls (*SEI/HERG\_G*) and *sei/hERG* (*SEI/HERG\_S*) fly hearts. Data was normalized to the average expression across row for each gene (Z-score). “Cool” green colors denote lower relative expression, “Warm” red colors denote higher relative expression while black denotes average expression.

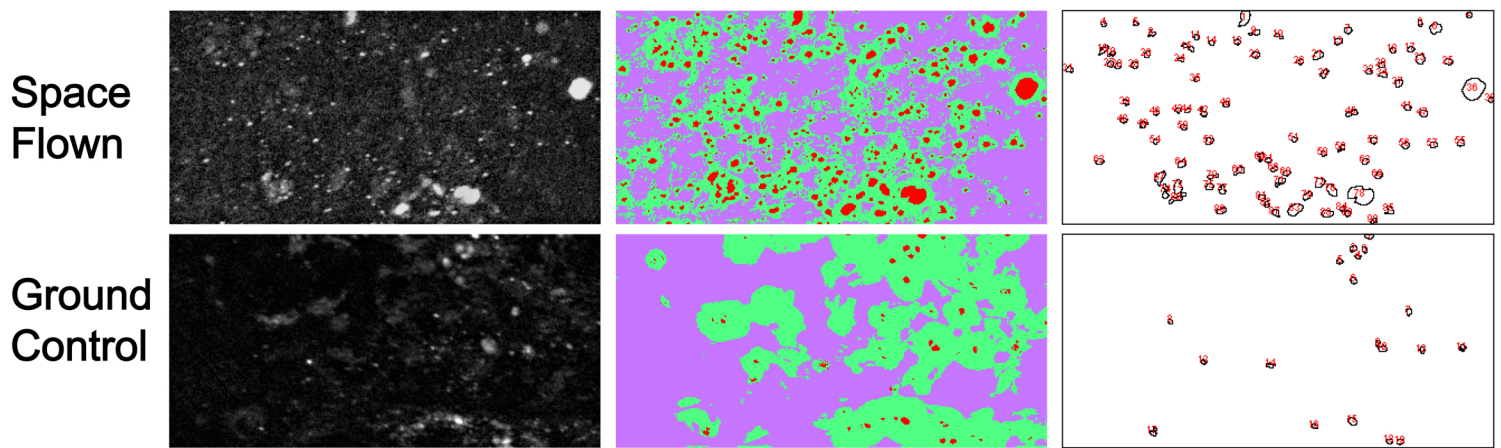

**Supplemental Figure 6 (related to Figure 4). Quantification of proteasome punctae.**

(Left panels) Z-stack images of hearts stained for proteasome subunits (left panels). (Middle Panels) Output from the trainable weka segmentation tool in ImageJ showing proteasome punctae identified by the algorithm in red. The punctae could be differentiated from the more diffuse staining haze (green) and true background (purple). (Right Panels) identified punctae were counted and outlined regions were used to calculate the total area in Image J.

**Supplemental Table 1. 38 upregulated genes commonly shared between CS and sei under ug**

| Fly Symbol     | Human Symbol    | DIOPT | Description                                  |
|----------------|-----------------|-------|----------------------------------------------|
| CG5380         | POLR3F          | 15    | DNA-directed RNA Polymerase III Subunit RPC6 |
| mst            | MSTO1           | 15    | Mitochondrial Dist.& Morphology Regulator    |
| Npl4           | NPLOC4          | 14    | Nuclear Protein Localization 4               |
| CG1218         | HPF1            | 14    | Histone Parylation Factor 1                  |
| ERR            | ESRRG           | 14    | Estrogen-Related Receptor Gamma              |
| Fem-1          | FEM1B           | 14    | FEM1-Like Protein in Apoptotic Pathway       |
| htl            | FGFR3           | 14    | Fibroblast Growth Factor Receptor 3          |
| CG15771        | NANP            | 13    | N-acetylneraminic acid phosphatase           |
| Keap1          | KEAP1           | 13    | Kelch-like ECH-Associated Protein            |
| Shaw           | KCNC2           | 13    | Shaw-Related Voltage Gated Potassium Channel |
| Prosalpha6     | PSMA1           | 13    | Proteasome Subunit Alpha Type I              |
| CG5846         | RFXANK          | 13    | Regulatory Factor X                          |
| Rpn13          | ADRM1           | 13    | Adhesion-Regulating Molecule 1               |
| CG4572         | CPVL            | 13    | Vitellogenic-like Carboxypeptidase           |
| NetA           | NTN1            | 12    | Netrin 1                                     |
| Elk            | KCNH8           | 12    | Voltage-Gated Potassium Channel H8 Family    |
| B9d1           | B9D1            | 12    | B9-Domain Containing Protein 1               |
| MED30          | MED30           | 12    | Mediator Complex Subunit 30                  |
| Lnk            | SH2B2           | 11    | SHB2 Adaptor Protein                         |
| CG5445         | ILRUN           | 11    | Chromosome 6 ORF 106                         |
| neb            | KIF14           | 10    | Kinesin Family Member 14                     |
| Rh6            | OPN4            | 9     | Opsin 4                                      |
| Cyp6a8         | CYP3A43         | 6     | Cytochrome P450 Subfamily IIIA               |
| Neto           | NETO2           | 6     | Neuropilin and Tolloid-like 2                |
| Cyp6a8         | CYP3A7-CYP3A51P | 5     | Cytochrome P450 Subfamily IIIA               |
| CG3223         | UBL7            | 5     | Ubiquitin-like 7                             |
| CG3308         | TATDN2          | 5     | Putative Deoxyribonuclease                   |
| Tsf1           | MELTF           | 5     | Melanoma-associated antigen p97              |
| CG42554        | NRBF2           | 4     | Nuclear Receptor Binding Factor 2            |
| dome           | PTPRQ           | 2     | Proteinptyrosine phosphatase                 |
| CG2046         | PSMG1           | 2     | Proteasome Assembly Chaperone 1              |
| CG34149        | GPD1L           | 1     | Glycerol-3-Phosphate Dehydrogenase 1-like    |
| CG8852         | LRRC3           | 1     | Leucine-Rich Repeat-Containing Protein 3     |
| Sry-beta       | ZNF576          | 1     | Zinc Finger Protein 576                      |
| CG10479        | SH2D5           | 1     | SH2 Domain Containing Protein 5              |
| CG11398        | ZNF576          | 1     | Zinc Finger Protein 576                      |
| lncRNA:CR40469 | N.O.I           | 0     | N/A                                          |
| CG5612         | N.O.I           | 0     | N/A                                          |
| Fie            | N.O.I           | 0     | N/A                                          |
| CG32428        | N.O.I           | 0     | N/A                                          |

**Supplemental Table 1 (related to Figure 2). 38 upregulated genes commonly shared between CS and sei/hERG under  $\mu\text{g}$ .** Table lists fly genes, corresponding human orthologs, DIOPT orthology scores and description of human gene function.



**Supplemental Table 2. Differentially expressed gene subsets commonly shared between CS and sei under ug**

| <b>TERM</b>   | <b>Dir.</b> | <b>DESCRIPTION</b>                | <b>COUNT</b> | <b>FOLD</b> | <b>FDR</b> |
|---------------|-------------|-----------------------------------|--------------|-------------|------------|
| BP_GO:0040003 | dwn         | chitin-based cuticle development  | 12           | 6.34        | 7.9E-4     |
| BP_GO:0005975 | dwn         | carbohydrate metabolic process    | 10           | 5.29        | 0.005      |
| BP_GO:0006508 | dwn         | proteolysis                       | 12           | 6.34        | 0.02       |
| CC_GO:0005615 | dwn         | extracellular space               | 23           | 12.1        | 1.4E-4     |
| MF_GO:0042302 | dwn         | structural constituent of cuticle | 13           | 6.87        | 2.2E-6     |
| KEGG_dme00564 | dwn         | Glycerophospholipid metabolism    | 5            | 2.64        | 0.002      |

**Supplemental Table 2 (related to Figure 2). Differentially expressed gene subsets commonly shared between CS and sei/hERG under  $\mu\text{g}$ .** Table lists gene ontology term, direction (dir.) either upregulated (up) or downregulated (dwn) genes, (BP- biological process, MF-molecular function, CC-cellular localization, KEGG- KEGG pathway ID), ontological description, fold enrichment and false discovery rate (FDR) statistics.
